# Supplementary material for: Divergent discourse between protests and counter-protests: #BlackLivesMatter and #AllLivesMatter
Source: PubMed Central journal article supplement (PMC5906010; doi:10.1371/journal.pone.0195644), 2018-04-18
Supplement: pone.0195644.s021.pdf [file pone.0195644.s021.pdf]

| <b>#BlackLivesMatter</b> | Nodes | % Original Nodes | Edges | Clustering |
|--------------------------|-------|------------------|-------|------------|
| Nov. 24–Nov. 30, 2014    | 298   | 9.07%            | 583   | 0.0590     |
| Dec. 3–Dec. 9, 2014      | 444   | 7.83%            | 1025  | 0.0595     |
| Dec. 20–Dec. 26, 2014    | 227   | 7.24%            | 485   | 0.1494     |
| Feb. 8–Feb. 14, 2015     | 82    | 5.57%            | 119   | 0.1946     |
| Apr. 4–Apr. 10, 2015     | 99    | 5.10%            | 139   | 0.0905     |
| Apr. 26–May 2, 2015      | 294   | 6.96%            | 607   | 0.0976     |
| Jun. 17–Jun. 23, 2015    | 190   | 7.23%            | 305   | 0.0795     |
| Jul. 21–Jul. 27, 2015    | 250   | 7.15%            | 475   | 0.0898     |
| <b>#AllLivesMatter</b>   |       |                  |       |            |
| Nov. 24–Nov. 30, 2014    | 29    | 6.43%            | 40    | 0.1200     |
| Dec. 3–Dec. 9, 2014      | 37    | 4.68%            | 62    | 0.2456     |
| Dec. 20–Dec. 26, 2014    | 54    | 5.21%            | 94    | 0.2500     |
| Feb. 8–Feb. 14, 2015     | 24    | 4.67%            | 30    | 0.1521     |
| Apr. 4–Apr. 10, 2015     | 10    | 2.69%            | 9     | 0.0000     |
| Apr. 26–May 2, 2015      | 44    | 4.77%            | 76    | 0.1944     |
| Jun. 17–Jun. 23, 2015    | 23    | 4.77%            | 33    | 0.4909     |
| Jul. 21–Jul. 27, 2015    | 47    | 6.08%            | 66    | 0.1151     |
