# Supplementary material for: Divergent discourse between protests and counter-protests: #BlackLivesMatter and #AllLivesMatter
Source: PubMed Central journal article supplement (PMC5906010; doi:10.1371/journal.pone.0195644), 2018-04-18
Supplement: pone.0195644.s022.pdf [file pone.0195644.s022.pdf]

|                       | #BlackLivesMatter                                                                                                                                                                        |                                                                                                  | #AllLivesMatter                                                                                                                                                                                                   |                                                                                                  |
|-----------------------|------------------------------------------------------------------------------------------------------------------------------------------------------------------------------------------|--------------------------------------------------------------------------------------------------|-------------------------------------------------------------------------------------------------------------------------------------------------------------------------------------------------------------------|--------------------------------------------------------------------------------------------------|
|                       | Top Hashtags                                                                                                                                                                             | Betweenness                                                                                      | Top Hashtags                                                                                                                                                                                                      | Betweenness                                                                                      |
| Nov. 24–Nov. 30, 2014 | 1. ferguson<br>2. mikebrown<br>3. standup<br>4. tamirrice<br>5. truth<br>6. fergusondecision<br>7. arrestdarrenwilson<br>8. justiceformikebrown<br>9. shutitdownatl<br>10. allivesmatter | 0.8356<br>0.1584<br>0.0845<br>0.0835<br>0.0804<br>0.7935<br>0.0716<br>.0704<br>0.0645<br>0.0488  | 1. blacklivesmatter<br>2. ferguson<br>3. policebrutality<br>4. mikebrown<br>5. fergusondecision                                                                                                                   | 0.6116<br>0.4550<br>0.1733<br>0.1566<br>0.1566                                                   |
| Dec. 3–Dec. 9, 2014   | 1. icantbreathe<br>2. ericgarner<br>3. ferguson<br>4. civilrights<br>5. shutitdown<br>6. lebronjames<br>7. rip<br>8. cantbreathe<br>9. mikebrown<br>10. nojusticenopeace                 | 0.4434<br>0.4126<br>0.2706<br>0.0952<br>0.0939<br>0.0823<br>0.0654<br>0.0624<br>0.0611<br>0.0514 | 1. blacklivesmatter<br>2. shutitdown<br>3. ferguson<br>4. ericgarner<br>5. policebrutality<br>6. tcot<br>7. icantbreathe<br>8. miami<br>9. crimingwhilewhite<br>10. handsupdontshoot                              | 0.5153<br>0.3490<br>0.2827<br>0.2750<br>0.2045<br>0.1908<br>0.1693<br>0.0667<br>0.0667<br>0.0114 |
| Dec. 20–Dec. 26, 2014 | 1. icantbreathe<br>2. ferguson<br>3. antoniomartin<br>4. shutitdown<br>5. ny<br>6. handsupdontshoot<br>7. racism<br>8. obama<br>9. mlk<br>10. justice                                    | 0.5229<br>0.2938<br>0.2105<br>0.1575<br>0.1174<br>0.1012<br>0.0948<br>0.9411<br>0.0702<br>0.0640 | 1. nypd<br>2. policelivesmatter<br>3. blacklivesmatter<br>4. icantbreathe<br>5. bluelivesmatter<br>6. ferguson<br>7. handsupdontshoot<br>8. nyc<br>9. nojusticenopeace<br>10. ericgarner                          | 0.4884<br>0.3307<br>0.3064<br>0.2461<br>0.2012<br>0.1833<br>0.1679<br>0.1461<br>0.0987<br>0.0910 |
| Feb. 8–Feb. 14, 2015  | 1. blackhistorymonth<br>2. grammys<br>3. bhm<br>4. muslimlivesmatter<br>5. allivesmatter<br>6. bluelivesmatter<br>7. ferguson<br>8. icantbreathe<br>9. ericgarner<br>10. racist          | 0.6504<br>0.5549<br>0.4987<br>0.4961<br>0.4769<br>0.3938<br>0.3226<br>0.2779<br>0.1841<br>0.1445 | 1. muslimlivesmatter<br>2. blacklivesmatter<br>3. chapelhillshooting<br>4. jewishlivesmatter<br>5. whitelivesmatter<br>6. ourthreewinners                                                                         | 0.5661<br>0.3750<br>0.3161<br>0.2279<br>0.01764<br>0.1323                                        |
| Apr. 4–Apr. 10, 2015  | 1. walterscott<br>2. blacktwitter<br>3. icantbreathe<br>4. allivesmatter<br>5. ripwalterscott<br>6. p2<br>7. tcot<br>8. kendrickjohnson<br>9. ferguson<br>10. racism                     | 0.8083<br>0.2307<br>0.1502<br>0.1488<br>0.1467<br>0.1061<br>0.0645<br>0.0645<br>0.0592<br>0.0558 | 1. blacklivesmatter                                                                                                                                                                                               | 1.0000                                                                                           |
| Apr. 26–May 2, 2015   | 1. freddiegray<br>2. baltimore<br>3. blackpower<br>4. baltimoreriots<br>5. baltimoreuprising<br>6. ferguson<br>7. solidarity<br>8. baltimore<br>9. mayday<br>10. allivesmatter           | 0.4534<br>0.3441<br>0.2258<br>0.2120<br>0.1801<br>0.1518<br>0.1159<br>0.1002<br>0.0842<br>0.0833 | 1. blacklivesmatter<br>2. peace<br>3. baltimoreriots<br>4. baltimore<br>5. justice<br>6. policelivesmatter<br>7. freddiegray<br>8. bluelivesmatter<br>9. baltimoreuprising<br>10. asianlivesmatter                | 0.6531<br>0.3198<br>0.2515<br>0.2289<br>0.1321<br>0.1118<br>0.0975<br>0.0720<br>0.0540<br>0.0270 |
| Jun. 17–Jun. 23, 2015 | 1. charlestonshooting<br>2. charleston<br>3. tcot<br>4. confederateflag<br>5. racheldolezal<br>6. blacktwitter<br>7. usa<br>8. baltimore<br>9. love<br>10. staywoke                      | 0.6321<br>0.4336<br>0.1727<br>0.1547<br>0.1168<br>0.1047<br>0.0943<br>0.0904<br>0.0794<br>0.0792 | 1. charlestonshooting<br>2. blacklivesmatter<br>3. bluelivesmatter<br>4. gunsense<br>5. 2a<br>6. pjnet<br>7. gohomederay<br>8. ferguson<br>9. wakeupamerica<br>10. tcot                                           | 0.6667<br>0.6238<br>0.4968<br>0.2571<br>0.1857<br>0.1809<br>0.0952<br>0.0952<br>0.0015<br>0.0015 |
| Jul. 21–Jul. 27, 2015 | 1. sandrabland<br>2. sayhername<br>3. justiceforsandrabland<br>4. blacktwitter<br>5. allivesmatter<br>6. wewantanswers<br>7. blackpower<br>8. sandra<br>9. m4bl<br>10. blm               | 0.7038<br>0.1985<br>0.1533<br>0.1385<br>0.1154<br>0.1153<br>0.1128<br>0.0891<br>0.0731<br>0.0656 | 1. blacklivesmatter<br>2. tcot<br>3. policebrutality<br>4. uniteblue<br>5. sandrabland<br>6. pjnet<br>7. justiceforsandrabland<br>8. defundplannedparenthood<br>9. wakeupamerica<br>10. whathappenedtosandrabland | 0.7842<br>0.3689<br>0.2177<br>0.1794<br>0.1754<br>0.1411<br>0.1209<br>0.1189<br>0.1028<br>0.0625 |
