# Supplementary material for: Divergent discourse between protests and counter-protests: #BlackLivesMatter and #AllLivesMatter
Source: PubMed Central journal article supplement (PMC5906010; doi:10.1371/journal.pone.0195644), 2018-04-18
Supplement: pone.0195644.s023.pdf [file pone.0195644.s023.pdf]

|                       | #BlackLivesMatter                                                                                                                                                                                   |                                                                                                  | #AllLivesMatter                                                                                                                                                                                                                                  |                                                                                                  |
|-----------------------|-----------------------------------------------------------------------------------------------------------------------------------------------------------------------------------------------------|--------------------------------------------------------------------------------------------------|--------------------------------------------------------------------------------------------------------------------------------------------------------------------------------------------------------------------------------------------------|--------------------------------------------------------------------------------------------------|
|                       | Top Hashtags                                                                                                                                                                                        | PageRank                                                                                         | Top Hashtags                                                                                                                                                                                                                                     | PageRank                                                                                         |
| Nov. 24–Nov. 30, 2014 | 1. ferguson<br>2. mikebrown<br>3. fergusondecision<br>4. shutitdown<br>5. michaelbrown<br>6. blackoutblackfriday<br>7. boycottblackfriday<br>8. justiceformikebrown<br>9. notonedime<br>10. america | 0.2299<br>0.0778<br>0.0504<br>0.0343<br>0.0258<br>0.0238<br>0.0203<br>0.0197<br>0.0176<br>0.0161 | 1. blacklivesmatter<br>2. ferguson<br>3. fergusondecision<br>4. mikebrown<br>5. nycprotest<br>6. williamsburg<br>7. brownlivesmatter<br>8. whitelivesmatter<br>9. sf<br>10. blackfridayblackout                                                  | 0.2647<br>0.2371<br>0.0575<br>0.0509<br>0.0397<br>0.0317<br>0.0239<br>0.0235<br>0.0224<br>0.0210 |
| Dec. 3–Dec. 9, 2014   | 1. ericgarner<br>2. icantbreathe<br>3. ferguson<br>4. mikebrown<br>5. nypd<br>6. shutitdown<br>7. handsupdontshoot<br>8. thisstopstoday<br>9. seattle<br>10. policebrutality                        | 0.1974<br>0.1548<br>0.0860<br>0.0296<br>0.0286<br>0.0251<br>0.0183<br>0.0151<br>0.0142<br>0.0140 | 1. blacklivesmatter<br>2. icantbreathe<br>3. ericgarner<br>4. ferguson<br>5. tcot<br>6. wecantbreathe<br>7. mikebrown<br>8. handsupdontshoot<br>9. rednationrising<br>10. shutitdown                                                             | 0.2052<br>0.1397<br>0.1295<br>0.0728<br>0.0404<br>0.0379<br>0.0371<br>0.0355<br>0.0268<br>0.0267 |
| Dec. 20–Dec. 26, 2014 | 1. icantbreathe<br>2. ferguson<br>3. shutitdown<br>4. antoniomartin<br>5. ericgarner<br>6. nypdlivesmatter<br>7. alllivesmatter<br>8. moa<br>9. nypd<br>10. mikebrown                               | 0.1043<br>0.0533<br>0.0450<br>0.0397<br>0.0333<br>0.0315<br>0.0256<br>0.0253<br>0.0247<br>0.0227 | 1. blacklivesmatter<br>2. nypdlivesmatter<br>3. nypd<br>4. policelivesmatter<br>5. ericgarner<br>6. mikebrown<br>7. bluelivesmatter<br>8. icantbreathe<br>9. nyc<br>10. stolenlives                                                              | 0.2042<br>0.0955<br>0.0945<br>0.0608<br>0.0569<br>0.0471<br>0.0328<br>0.0310<br>0.0291<br>0.0278 |
| Feb. 8–Feb. 14, 2015  | 1. muslimlivesmatter<br>2. alllivesmatter<br>3. handsupdontshoot<br>4. grammys<br>5. mikebrown<br>6. blackhistorymonth<br>7. beyhive<br>8. ferguson<br>9. blacktwitter<br>10. chapelhillshooting    | 0.1418<br>0.0730<br>0.0686<br>0.0575<br>0.0485<br>0.0467<br>0.0447<br>0.0338<br>0.0273<br>0.0244 | 1. muslimlivesmatter<br>2. blacklivesmatter<br>3. chapelhillshooting<br>4. butinacosmicsensenothingreallymatters<br>5. jewishlivesmatter<br>6. christianslivesmatter<br>7. buddhistlivesmatter<br>8. whitelivesmatter<br>9. rip<br>10. hatecrime | 0.3171<br>0.1815<br>0.1791<br>0.0582<br>0.0534<br>0.0218<br>0.0218<br>0.0214<br>0.0197<br>0.0181 |
| Apr. 4–Apr. 10, 2015  | 1. walterscott<br>2. ferguson<br>3. ericgarner<br>4. trayvonmartin<br>5. blacktwitter<br>6. icantbreathe<br>7. mikebrown<br>8. ftp<br>9. alllivesmatter<br>10. black                                | 0.2141<br>0.0850<br>0.0708<br>0.0619<br>0.0492<br>0.0381<br>0.0231<br>0.0217<br>0.0175<br>0.0148 | 1. blacklivesmatter<br>2. walterscott<br>3. muslimlivesmatter<br>4. whitelivesmatter<br>5. icantbreathe<br>6. ripwalterscott<br>7. ifnotnowwhen                                                                                                  | 0.4710<br>0.2253<br>0.0705<br>0.0667<br>0.0629<br>0.0516<br>0.0516                               |
| Apr. 26–May 2, 2015   | 1. freddiegray<br>2. baltimore<br>3. baltimoreuprising<br>4. baltimoreriots<br>5. alllivesmatter<br>6. ericgarner<br>7. ferguson<br>8. mayday<br>9. blackspring<br>10. michaelbrown                 | 0.1362<br>0.1154<br>0.0850<br>0.0787<br>0.0153<br>0.0132<br>0.0128<br>0.0115<br>0.0108<br>0.0094 | 1. blacklivesmatter<br>2. baltimoreriots<br>3. baltimore<br>4. freddiegray<br>5. policelivesmatter<br>6. baltimoreuprising<br>7. tcot<br>8. whitelivesmatter<br>9. wakeupamerica<br>10. prayforbaltimore                                         | 0.2104<br>0.1416<br>0.1115<br>0.0799<br>0.0427<br>0.0419<br>0.0327<br>0.0304<br>0.0205<br>0.0192 |
| Jun. 17–Jun. 23, 2015 | 1. charlestonshooting<br>2. racism<br>3. charleston<br>4. whiteprivilege<br>5. blacktwitter<br>6. ferguson<br>7. itsaracething<br>8. usa<br>9. southcarolina<br>10. alllivesmatter                  | 0.1670<br>0.0361<br>0.0349<br>0.0217<br>0.0216<br>0.0203<br>0.0198<br>0.0197<br>0.0189<br>0.0186 | 1. blacklivesmatter<br>2. iamame<br>3. wakeupamerica<br>4. pjnet<br>5. bluelivesmatter<br>6. tcot<br>7. 2a<br>8. charlestonshooting<br>9. ohhillno<br>10. cosproject                                                                             | 0.2059<br>0.1423<br>0.0699<br>0.0656<br>0.0648<br>0.0634<br>0.0602<br>0.0392<br>0.0378<br>0.0378 |
| Jul. 21–Jul. 27, 2015 | 1. sandrabland<br>2. sayhername<br>3. justiceforsandrabland<br>4. blackwomenmatter<br>5. doj<br>6. blacktwitter<br>7. unitedblue<br>8. alllivesmatter<br>9. whathappenedtosandrabland<br>10. tcot   | 0.2013<br>0.1449<br>0.0422<br>0.0352<br>0.0238<br>0.0201<br>0.0169<br>0.0163<br>0.0159<br>0.0132 | 1. blacklivesmatter<br>2. sandrabland<br>3. pjnet<br>4. defundpp<br>5. justiceforsandrabland<br>6. uniteblue<br>7. sayhername<br>8. defundplannedparenthood<br>9. tcot<br>10. prolife                                                            | 0.2302<br>0.0996<br>0.0661<br>0.0526<br>0.0505<br>0.0486<br>0.0472<br>0.0470<br>0.0456<br>0.0344 |
