# Supplementary material for: Divergent discourse between protests and counter-protests: #BlackLivesMatter and #AllLivesMatter
Source: PubMed Central journal article supplement (PMC5906010; doi:10.1371/journal.pone.0195644), 2018-04-18
Supplement: pone.0195644.s024.pdf [file pone.0195644.s024.pdf]

| Time Period   | KS Statistic | $p$ -value             |
|---------------|--------------|------------------------|
| November 2014 | 0.391        | $1.4 \times 10^{-67}$  |
| December 2014 | 0.481        | $4.9 \times 10^{-102}$ |
| January 2015  | 0.964        | $1.0 \times 10^{-308}$ |
| February 2015 | 0.441        | $7.8 \times 10^{-86}$  |
| March 2015    | 0.772        | $3.7 \times 10^{-262}$ |
| April 2015    | 0.953        | $1.0 \times 10^{-308}$ |
| May 2015      | 0.806        | $1.0 \times 10^{-285}$ |
| June 2015     | 0.845        | $5.3 \times 10^{-314}$ |
| July 2015     | 0.498        | $2.4 \times 10^{-109}$ |
| August 2015   | 0.930        | $1.0 \times 10^{-308}$ |
